# Supplementary material for: Stability, antioxidant activity and in vitro bile acid-binding of green, black and dark tea polyphenols during simulated in vitro gastrointestinal digestion
Source: Royal Society of Chemistry journal article supplement (doi:10.1039/c5ra18784b), 2015-01-01
Supplement: c5ra18784b1.pdf [file c5ra18784b1.pdf]

## Supplement

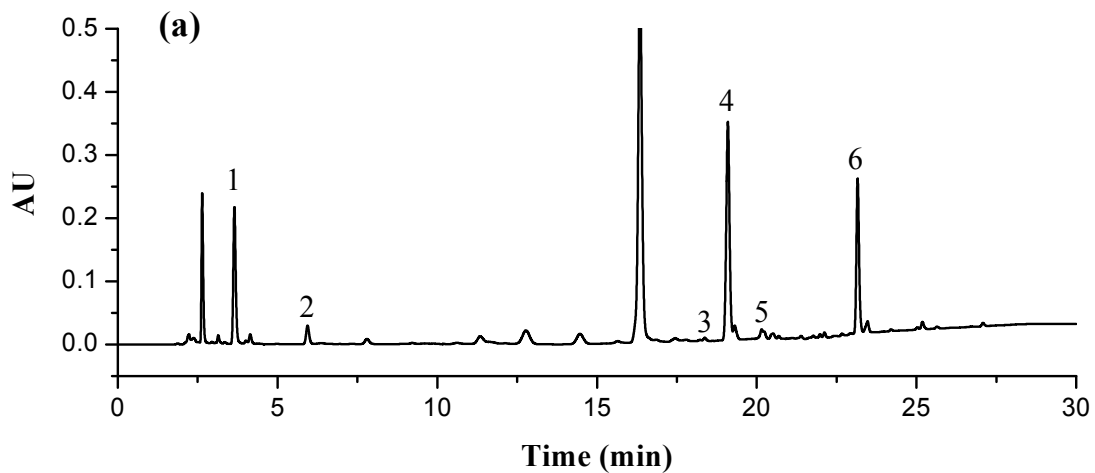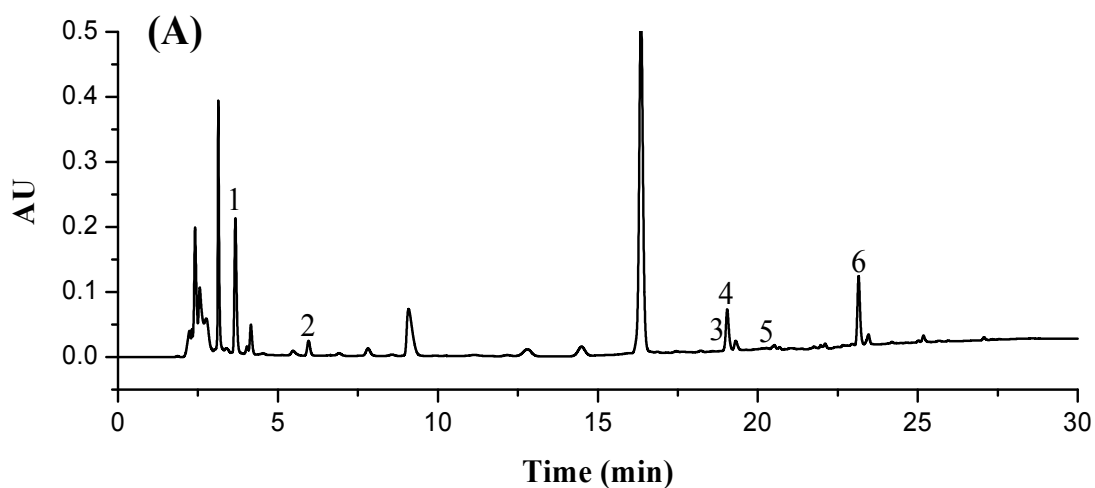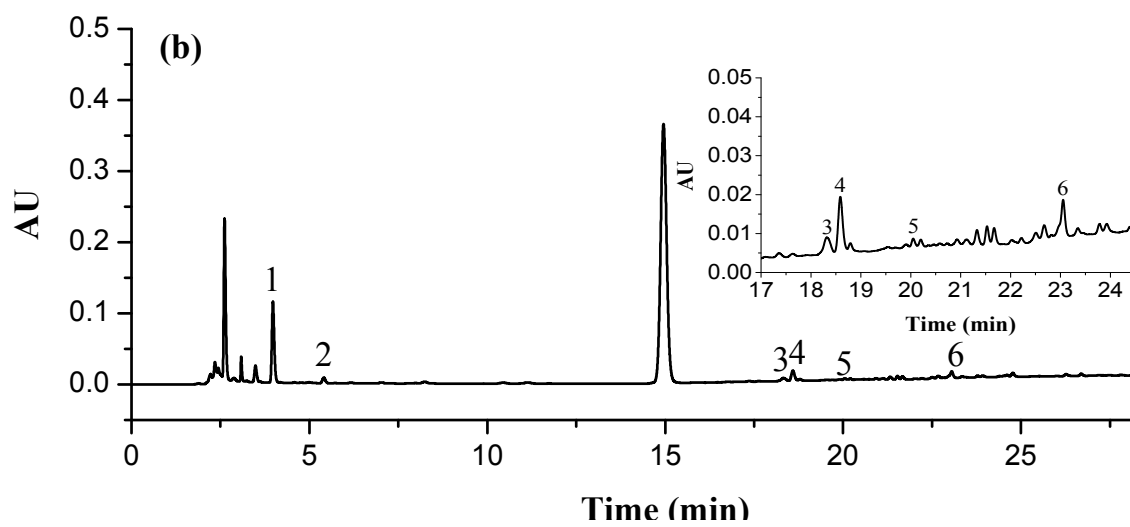

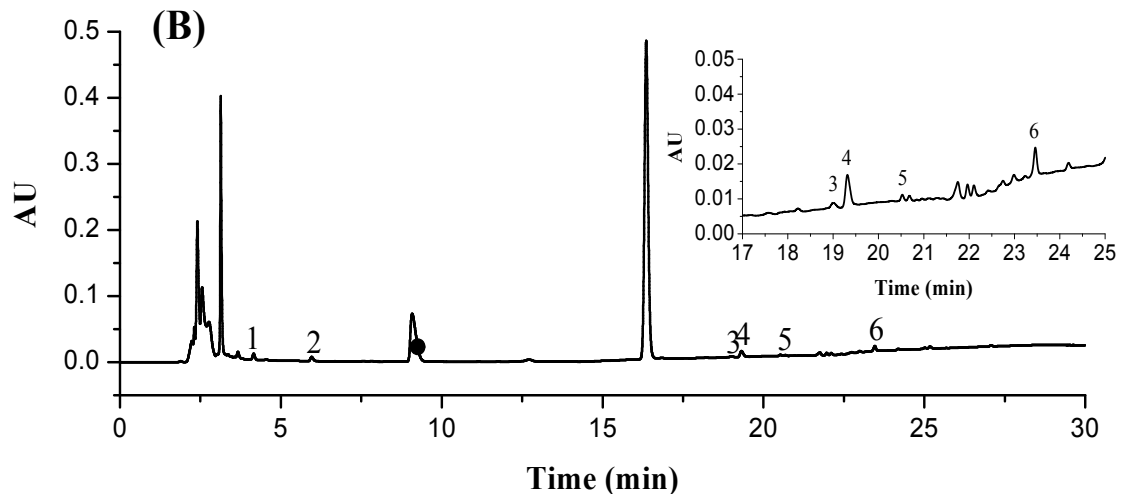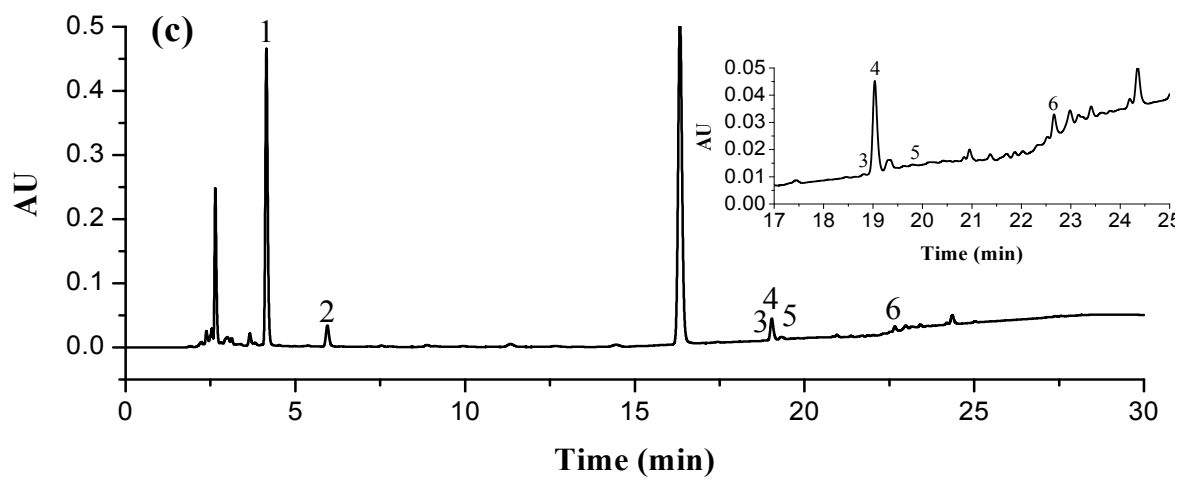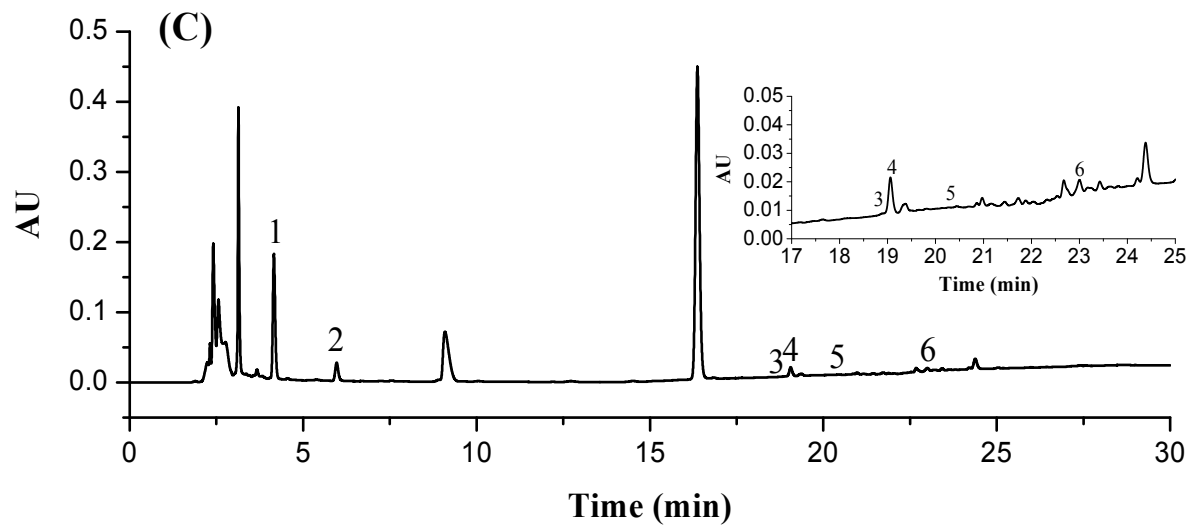

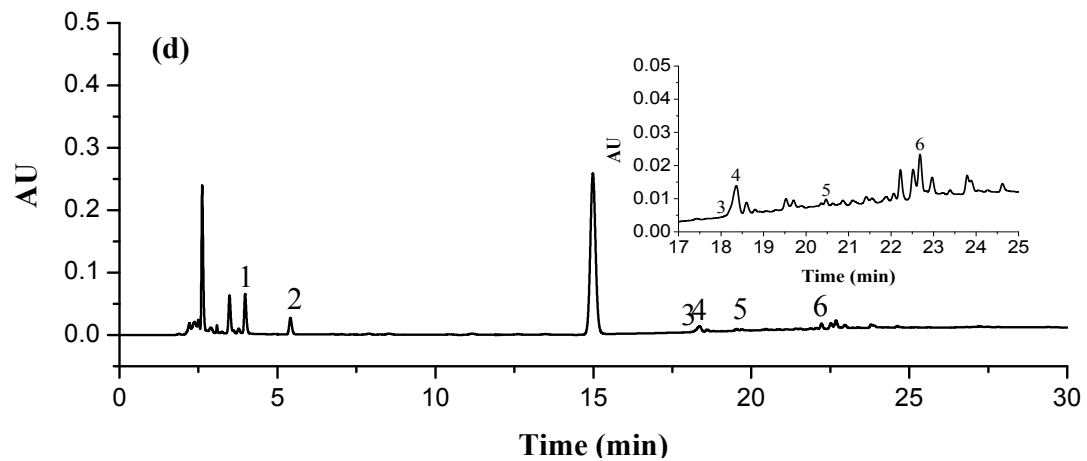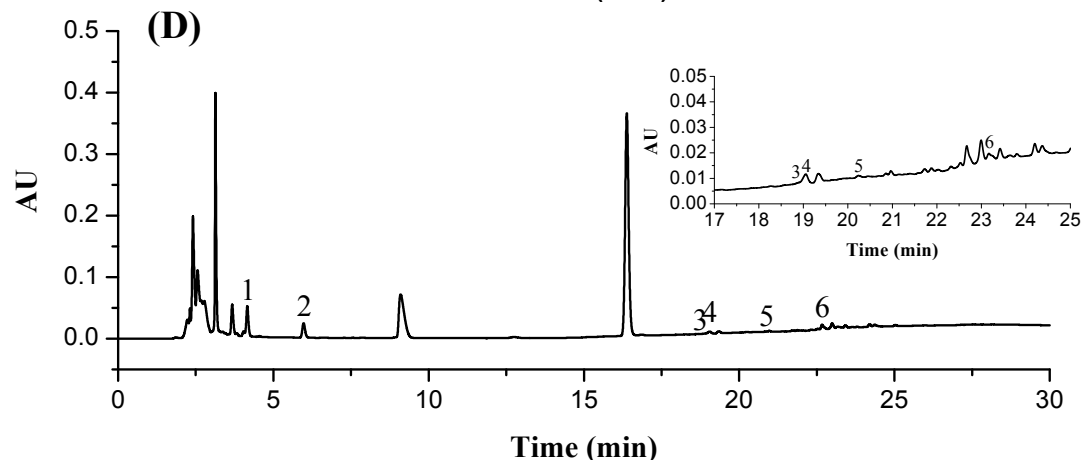

Supplement 1. HPLC chromatograms of green, black, raw liubao, and aged liubao tea after in vitro digestion procedure at 278nm. Nondigested sample were diluted 10 folds, and digested sample were diluted 11 folds. (a, A) the Nondigested green tea and digested green tea; (b, B) the Nondigested black tea and digested black tea; (c, C) the Nondigested raw liubao tea and digested raw liubao tea; (d, D) the Nondigested aged liubao tea and digested aged liubao tea. The peaks indicate the following: (1) GA; (2) GC; (3) EC; (4) EGCG; (5) GCG; (6) ECG.
